# Supplementary material
Source: PubMed Central journal article supplement (PMC4019191)

73 **Supplemental Figure 1.** (A) Coomassie Blue stained SDS-PAGE gel of needle-protein  
74 purifications and (B) Immunoblot of needle proteins probed with Anti-His<sub>5</sub> antibody.

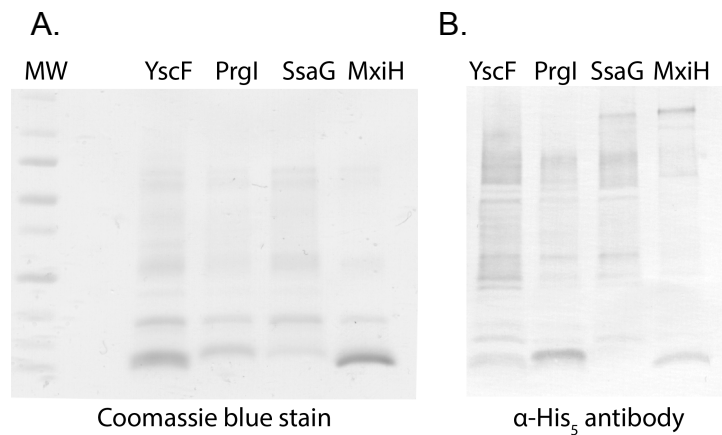

75 **Supplemental Figure 2. YscF activation of NF-kB/AP-1 is concentration dependent.**

76 THP1-X-Blue cells were seeded in wells and treated with PBS, or YscF dissolved in  
77 PBS at indicated concentrations. SEAP activity was measured as a representation of  
78 NF-kB/AP-1 activation.

79 A.

80

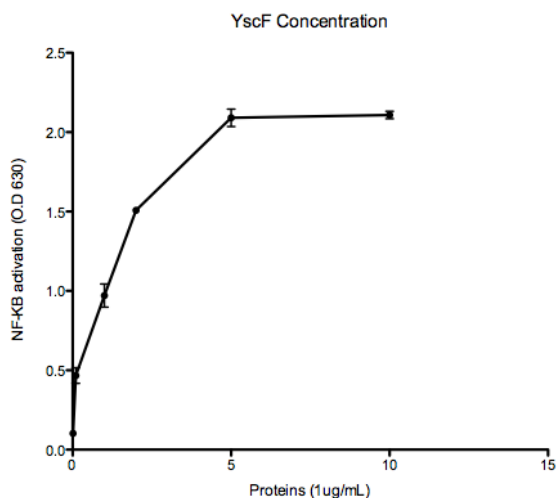

81 **Supplemental Figure 3. Activation of NF- $\kappa$ B/AP-1 in THP1-XBlue cells by needle**  
82 **proteins is not due to LPS contamination.**

83 (A) An LPS kit was used to analyze the level of LPS contamination in the needle protein  
84 preparations. (B) The LPS standards were used to treat THP1-XBlue cells. For both (A)  
85 and (B) SEAP activity was measured as a representation of NF- $\kappa$ B/AP-1 activation.

86 Error bars represent SEM. n=3. Shown experiments are representative of at least three  
87 experiments. \*\*\* represents p of <0.001

88

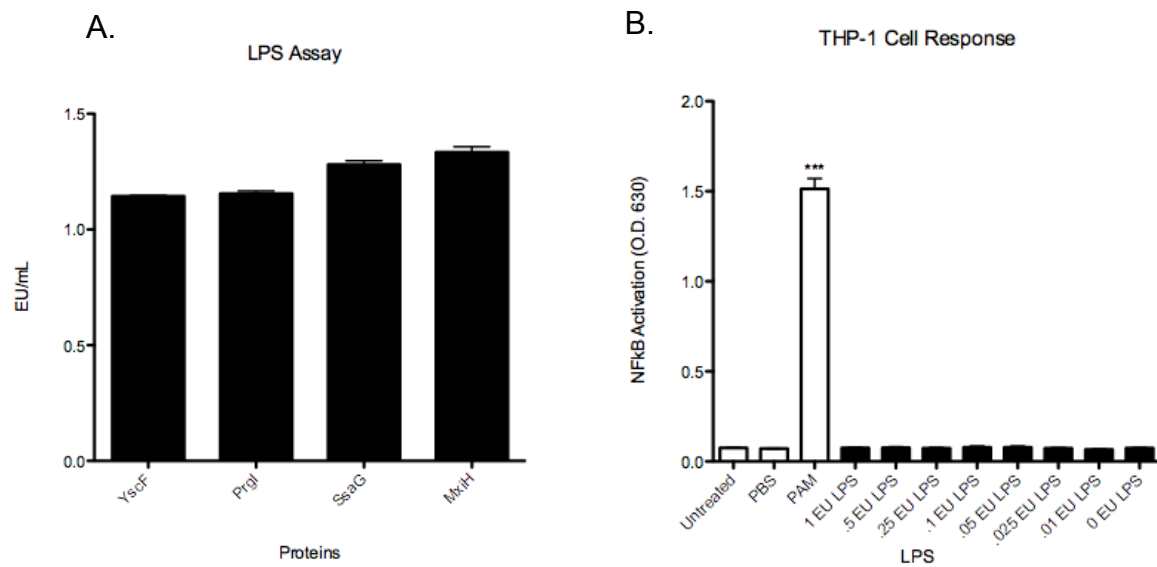

90 **Supplemental Figure 4. His<sub>6</sub>-tagged LcrG does not activate NF-κB/AP-1 in THP1-**  
91 **XBlue cells.**  
92 (A) THP1-Xblue cells (B) HEK-Blue hTLR2 cells or (C) HEK-Blue hTLR4 cells were  
93 tested with 1 μg/ml of His-tagged LcrG proteins dissolved in PBS. LPS, 1 μg/ml, was the  
94 positive control for THP-1 cells and HEK cells expressing TLR4. HKLM, 1 μg/ml, was the  
95 positive control for HEK-Blue hTLR2 cells. SEAP activity was measured as a  
96 representation of NF-κB/AP-1 activation. Error bars represent SEM. n=3. Shown  
97 experiments are representative of at least three experiments. \*\*\* represents p of <0.001.

98  
99 A.

B.

100

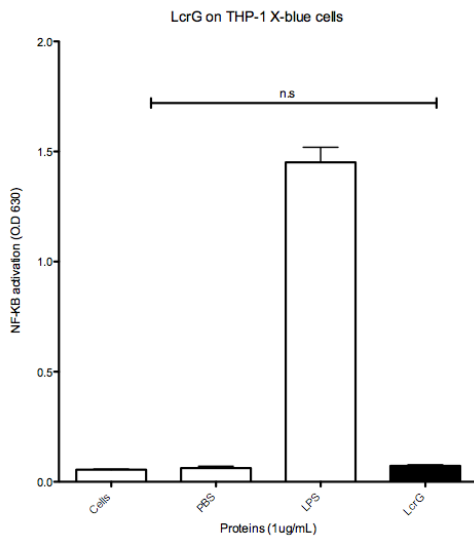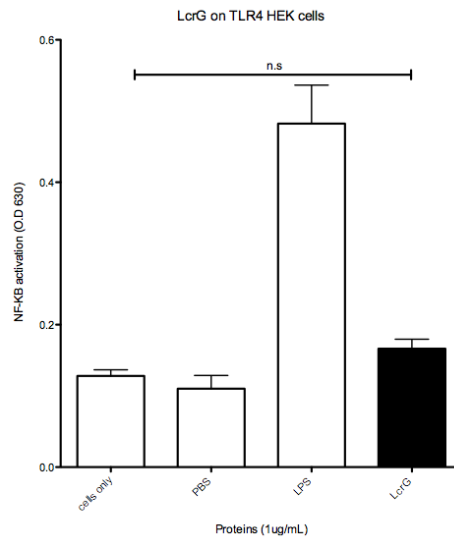

C.

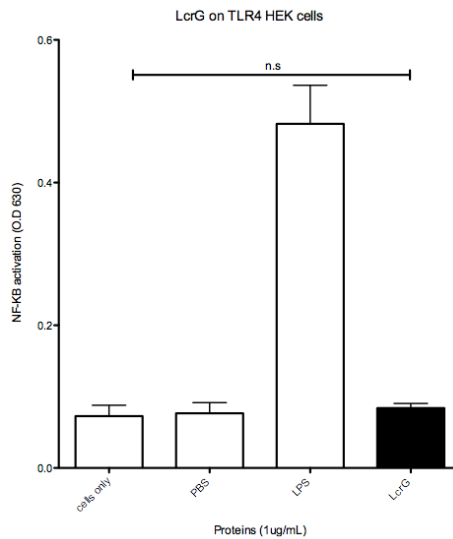

101 **Supplemental Figure 5. Purified Needles treated with lipoprotein lipase and**  
 102 **polymyxin B indicate needles cause NF-kB/AP-1 activation.** Purified Needles (1  
 103  $\mu\text{g/ml}$ ), PBS, LPS (1  $\mu\text{g/ml}$ ) or Pam3 (1  $\mu\text{g/ml}$ ) were incubated with (A) lipoprotein lipase  
 104 (LPL; 50  $\mu\text{g/ml}$ ), (B) polymyxin B (PMB; 20  $\mu\text{g/ml}$ ) before addition to THP1-XBlue cells.  
 105 SEAP activity was measured as a representation of NF-kB/AP-1 activation. Error bars  
 106 represent SEM.  $n=3$ . Shown experiments are representative of at least three  
 107 experiments. \*\*\* represents  $p$  of  $<0.001$ .  
 108  
 109

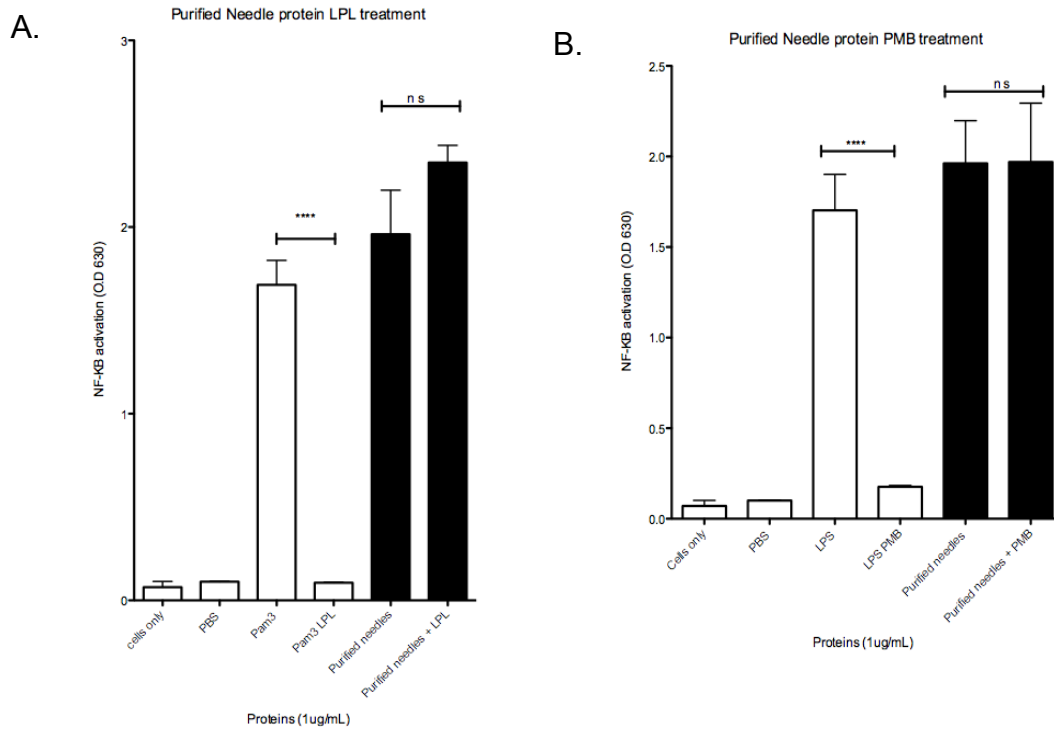

Supplement: IAI.01705-14_zii999090676so1.pdf [file IAI.01705-14_zii999090676so1.pdf]
